# Supplementary material
Source: PubMed Central journal article supplement (PMC3355661)
Supplement: NIHMS360721-supplement-Supplementary.pdf [file NIHMS360721-supplement-Supplementary.pdf]

Online Resource 1. Minor allele frequencies in *ADIPOQ*, *LEP*, and *LEPR* SNPs, adjusted for sampling probabilities<sup>a</sup>.

| SNP           | Allele | Minor allele frequency (%) |                  |
|---------------|--------|----------------------------|------------------|
|               |        | Non-African American       | African American |
| <i>ADIPOQ</i> |        |                            |                  |
| rs16861194    | G      | 9                          | 23               |
| rs16861205    | A      | 8                          | 18               |
| rs822391      | C      | 23                         | 4                |
| rs16861210    | A      | 9                          | 17               |
| rs822396      | G      | 22                         | 22               |
| rs12495941    | T      | 36                         | 34               |
| rs7649121     | T      | 17                         | 15               |
| rs9877202     | G      | 0                          | 15               |
| rs2241766     | G      | 11                         | 4                |
| rs1501299     | A      | 25                         | 37               |
| rs3821799     | T      | 42                         | 56               |
| rs6444174     | C      | 1                          | 16               |
| rs6773957     | A      | 37                         | 55               |
| rs1063537     | T      | 11                         | 2                |
| rs9842733     | T      | 0                          | 9                |
| rs1403697     | C      | 0                          | 13               |
| <i>LEP</i>    |        |                            |                  |
| rs6976701     | A      | 1                          | 11               |
| rs4236625     | T      | 8                          | 17               |
| rs12706832    | A      | 44                         | 78               |
| rs10244329    | T      | 46                         | 50               |
| rs11763517    | C      | 46                         | 21               |
| rs7795794     | A      | 7                          | 14               |
| rs11760956    | A      | 36                         | 18               |
| rs10954173    | A      | 36                         | 18               |
| rs3793162     | A      | 1                          | 17               |
| rs3828942     | A      | 48                         | 20               |
| rs17151919    | A      | 0                          | 9                |
| rs17151922    | T      | 1                          | 25               |
| rs10954174    | A      | 0                          | 7                |
| rs11761556    | C      | 44                         | 85               |
| <i>LEPR</i>   |        |                            |                  |
| rs3806318     | G      | 27                         | 9                |
| rs1327118     | C      | 42                         | 45               |
| rs12145690    | C      | 42                         | 45               |
| rs9436738     | A      | 12                         | 12               |
| rs9436297     | C      | 12                         | 13               |
| rs9436740     | T      | 31                         | 53               |
| rs9436299     | C      | 32                         | 17               |
| rs17127608    | T      | 0                          | 15               |
| rs3790433     | A      | 22                         | 71               |

| SNP        | Allele | Minor allele frequency (%) |                  |
|------------|--------|----------------------------|------------------|
|            |        | Non-African American       | African American |
| rs17127618 | G      | 14                         | 21               |
| rs7534511  | A      | 30                         | 22               |
| rs9436301  | C      | 24                         | 41               |
| rs1887285  | C      | 9                          | 14               |
| rs17097182 | T      | 3                          | 27               |
| rs17412175 | A      | 50                         | 10               |
| rs970467   | A      | 10                         | 24               |
| rs9436746  | A      | 37                         | 60               |
| rs9436748  | T      | 49                         | 18               |
| rs6657868  | A      | 36                         | 48               |
| rs17127655 | T      | 1                          | 20               |
| rs6588147  | G      | 32                         | 15               |
| rs7531110  | G      | 38                         | 55               |
| rs7555955  | A      | 32                         | 16               |
| rs6704167  | T      | 47                         | 24               |
| rs7529650  | G      | 40                         | 60               |
| rs2025804  | C      | 32                         | 20               |
| rs7518849  | C      | 5                          | 16               |
| rs10158579 | C      | 12                         | 38               |
| rs11808888 | A      | 12                         | 51               |
| rs17127677 | T      | 12                         | 25               |
| rs17127686 | G      | 0                          | 16               |
| rs6694528  | T      | 12                         | 42               |
| rs11208654 | C      | 32                         | 20               |
| rs10889556 | G      | 27                         | 41               |
| rs7526141  | T      | 50                         | 9                |
| rs1171275  | A      | 16                         | 27               |
| rs1475397  | T      | 24                         | 62               |
| rs1627238  | T      | 16                         | 44               |
| rs11208662 | C      | 8                          | 17               |
| rs1171279  | T      | 24                         | 62               |
| rs1751492  | C      | 28                         | 31               |
| rs6697315  | C      | 33                         | 41               |
| rs1171267  | T      | 33                         | 36               |
| rs1782763  | C      | 32                         | 29               |
| rs1409802  | A      | 25                         | 19               |
| rs10157610 | T      | 0                          | 13               |
| rs3790431  | C      | 21                         | 27               |
| rs1137100  | G      | 25                         | 19               |
| rs3790429  | T      | 20                         | 11               |
| rs3790426  | T      | 21                         | 24               |
| rs1343982  | A      | 26                         | 32               |
| rs10493380 | C      | 22                         | 9                |
| rs1938489  | G      | 21                         | 27               |

| SNP        | Allele | Minor allele frequency (%) |                  |
|------------|--------|----------------------------|------------------|
|            |        | Non-African American       | African American |
| rs10889563 | G      | 46                         | 54               |
| rs12042877 | T      | 26                         | 29               |
| rs10749754 | A      | 42                         | 52               |
| rs12564626 | A      | 42                         | 43               |
| rs1137101  | G      | 43                         | 56               |
| rs4655537  | A      | 37                         | 37               |
| rs3828034  | C      | 20                         | 5                |
| rs12405556 | T      | 25                         | 16               |
| rs3762274  | G      | 38                         | 55               |
| rs11585329 | T      | 15                         | 4                |
| rs11801408 | T      | 23                         | 41               |
| rs8179183  | C      | 20                         | 21               |
| rs6678033  | A      | 41                         | 56               |
| rs4655555  | A      | 19                         | 17               |
| rs10889569 | T      | 41                         | 58               |
| rs6693573  | C      | 0                          | 6                |
| rs17127807 | G      | 2                          | 13               |
| rs6700896  | T      | 41                         | 49               |
| rs17127826 | G      | 2                          | 24               |
| rs17127828 | G      | 2                          | 15               |
| rs6413506  | G      | 0                          | 5                |

<sup>a</sup> counts (N) reflect raw data; percentages are adjusted for study sampling probabilities.



Online resource 2. Number of cases and controls by genotype for selected *ADIPOQ*, *LEP*, and *LEPR* SNPs associated with breast cancer in the CBCS.

|               | Controls | All cases | Luminal A cases | Basal-like cases |
|---------------|----------|-----------|-----------------|------------------|
|               | N        | N         | N               | N                |
| <i>ADIPOQ</i> |          |           |                 |                  |
| rs16861194    |          |           |                 |                  |
| GG            | 63       | 53        | 14              | 8                |
| AG            | 380      | 443       | 144             | 42               |
| AA            | 1332     | 1476      | 521             | 150              |
| rs16861205    |          |           |                 |                  |
| AA+AG         | 395      | 445       | 150             | 39               |
| GG            | 1381     | 1527      | 529             | 161              |
| rs3821799     |          |           |                 |                  |
| CC            | 482      | 548       | 191             | 58               |
| CT            | 854      | 942       | 323             | 80               |
| TT            | 440      | 482       | 165             | 62               |
| <i>LEP</i>    |          |           |                 |                  |
| rs6976701     |          |           |                 |                  |
| AA+AG         | 145      | 184       | 69              | 23               |
| GG            | 1630     | 1786      | 610             | 177              |
| rs3793162     |          |           |                 |                  |
| AA+AG         | 221      | 197       | 64              | 29               |
| GG            | 1555     | 1775      | 615             | 171              |
| rs17151922    |          |           |                 |                  |
| TT            | 42       | 51        | 12              | 7                |
| GT            | 259      | 334       | 111             | 40               |
| GG            | 1475     | 1587      | 556             | 153              |
| rs10954174    |          |           |                 |                  |
| AA+AG         | 106      | 128       | 35              | 23               |
| GG            | 1670     | 1844      | 644             | 177              |
| <i>LEPR</i>   |          |           |                 |                  |
| rs9436299     |          |           |                 |                  |
| CC            | 126      | 173       | 69              | 10               |
| AC            | 681      | 733       | 251             | 84               |
| AA            | 969      | 1066      | 359             | 106              |
| rs17412175    |          |           |                 |                  |
| AA            | 264      | 253       | 92              | 14               |
| AT+TT         | 1512     | 1719      | 587             | 186              |
| rs9436746     |          |           |                 |                  |
| CC            | 542      | 555       | 197             | 37               |

|            | Controls | All cases | Luminal A cases | Basal-like cases |
|------------|----------|-----------|-----------------|------------------|
|            | N        | N         | N               | N                |
| AA+AC      | 1230     | 1410      | 481             | 161              |
| rs9436748  |          |           |                 |                  |
| TT         | 262      | 244       | 88              | 14               |
| GG+GT      | 1511     | 1728      | 591             | 186              |
| rs6657868  |          |           |                 |                  |
| AA         | 309      | 364       | 132             | 36               |
| AG         | 840      | 919       | 310             | 110              |
| GG         | 626      | 689       | 237             | 54               |
| rs17127655 |          |           |                 |                  |
| TT+CT      | 248      | 236       | 70              | 29               |
| CC         | 1524     | 1729      | 606             | 170              |
| rs6588147  |          |           |                 |                  |
| GG         | 129      | 165       | 66              | 8                |
| AG         | 663      | 735       | 260             | 86               |
| AA         | 984      | 1072      | 353             | 106              |
| rs6704167  |          |           |                 |                  |
| TT         | 256      | 249       | 91              | 16               |
| AT         | 773      | 876       | 297             | 94               |
| AA         | 745      | 845       | 291             | 89               |
| rs7529650  |          |           |                 |                  |
| AA         | 485      | 550       | 196             | 39               |
| AG         | 877      | 930       | 307             | 112              |
| GG         | 413      | 490       | 176             | 49               |
| rs2025804  |          |           |                 |                  |
| CC         | 132      | 185       | 73              | 13               |
| CT         | 704      | 755       | 269             | 85               |
| TT         | 940      | 1032      | 337             | 102              |
| rs11808888 |          |           |                 |                  |
| AA         | 194      | 208       | 67              | 20               |
| AG         | 562      | 647       | 206             | 76               |
| GG         | 1020     | 1117      | 406             | 104              |
| rs11208654 |          |           |                 |                  |
| CC         | 133      | 180       | 69              | 12               |
| CT         | 706      | 772       | 277             | 88               |
| TT         | 931      | 1015      | 331             | 100              |
| rs10889556 |          |           |                 |                  |
| GG         | 168      | 218       | 78              | 23               |
| AG         | 759      | 815       | 287             | 98               |
| AA         | 848      | 939       | 314             | 79               |

|                   | Controls | All cases | Luminal A cases | Basal-like cases |
|-------------------|----------|-----------|-----------------|------------------|
|                   | N        | N         | N               | N                |
| rs7526141         |          |           |                 |                  |
| TT                | 267      | 266       | 103             | 17               |
| CT                | 664      | 746       | 270             | 68               |
| CC                | 843      | 959       | 306             | 115              |
| rs1751492         |          |           |                 |                  |
| CC                | 131      | 179       | 59              | 17               |
| CT                | 722      | 810       | 290             | 85               |
| TT                | 923      | 983       | 330             | 98               |
| rs1171267         |          |           |                 |                  |
| TT                | 186      | 248       | 85              | 25               |
| GG+GT             | 1589     | 1718      | 593             | 174              |
| rs1782763         |          |           |                 |                  |
| CC                | 159      | 226       | 78              | 21               |
| TT+CT             | 1615     | 1746      | 601             | 179              |
| rs1409802         |          |           |                 |                  |
| AA                | 76       | 120       | 42              | 8                |
| AG                | 619      | 685       | 254             | 72               |
| GG                | 1081     | 1167      | 383             | 120              |
| rs1137100 (K109R) |          |           |                 |                  |
| GG                | 79       | 122       | 45              | 8                |
| AG                | 615      | 673       | 248             | 70               |
| AA                | 1082     | 1175      | 384             | 122              |
| rs1343982         |          |           |                 |                  |
| AA                | 123      | 183       | 62              | 19               |
| GG+AG             | 1653     | 1789      | 617             | 181              |
| rs10889563        |          |           |                 |                  |
| AA                | 434      | 490       | 157             | 42               |
| AG                | 926      | 971       | 331             | 105              |
| GG                | 416      | 510       | 191             | 52               |
| rs12042877        |          |           |                 |                  |
| TT                | 116      | 174       | 60              | 20               |
| CC+CT             | 1660     | 1797      | 619             | 180              |
| rs10749754        |          |           |                 |                  |
| AA                | 387      | 472       | 177             | 48               |
| AG                | 890      | 945       | 319             | 106              |
| GG                | 499      | 555       | 183             | 46               |
| rs1137101 (Q223R) |          |           |                 |                  |
| GG                | 485      | 526       | 182             | 53               |
| AG                | 874      | 952       | 327             | 99               |

|            | Controls | All cases | Luminal A cases | Basal-like cases |
|------------|----------|-----------|-----------------|------------------|
|            | N        | N         | N               | N                |
| AA         | 416      | 494       | 170             | 48               |
| rs4655537  |          |           |                 |                  |
| AA         | 249      | 281       | 79              | 27               |
| AG         | 839      | 913       | 312             | 93               |
| GG         | 688      | 778       | 288             | 80               |
| rs3828034  |          |           |                 |                  |
| CC         | 39       | 44        | 14              | 5                |
| CT         | 390      | 382       | 152             | 28               |
| TT         | 1347     | 1546      | 513             | 167              |
| rs12405556 |          |           |                 |                  |
| TT         | 84       | 123       | 47              | 9                |
| GT         | 581      | 637       | 231             | 62               |
| GG         | 1111     | 1212      | 401             | 129              |
| rs3762274  |          |           |                 |                  |
| GG         | 351      | 426       | 161             | 49               |
| AG         | 880      | 921       | 311             | 93               |
| AA         | 545      | 623       | 205             | 58               |
| rs11801408 |          |           |                 |                  |
| TT         | 163      | 163       | 48              | 16               |
| CC+CT      | 1613     | 1809      | 631             | 184              |
| rs4655555  |          |           |                 |                  |
| AA         | 52       | 66        | 27              | 5                |
| AT         | 488      | 544       | 196             | 52               |
| TT         | 1236     | 1361      | 455             | 143              |
| rs17127826 |          |           |                 |                  |
| GG         | 41       | 35        | 8               | 6                |
| AA+AG      | 1735     | 1937      | 671             | 194              |
| rs6413506  |          |           |                 |                  |
| AG+GG      | 58       | 85        | 29              | 11               |
| AA         | 1718     | 1887      | 650             | 189              |



Online Resource 3. Estimated haplotype frequencies in CBCS participants, by case status.

| Haplotype     | Controls | All cases | Luminal A cases | Basal-like cases |
|---------------|----------|-----------|-----------------|------------------|
| <i>LEP</i>    |          |           |                 |                  |
| 1: A-T-T-G    | 0.12     | 0.13      | 0.12            | 0.17             |
| 2a: G-G-A-G-G | 0.07     | 0.05      | 0.05            | 0.08             |
| 2b: G-G-G-G-T | 0.10     | 0.11      | 0.10            | 0.13             |
| 3: T-G-C      | 0.07     | 0.09      | 0.08            | 0.09             |
| <i>LEPR</i>   |          |           |                 |                  |
| 4a: A-C-T     | 0.31     | 0.29      | 0.31            | 0.23             |
| 4b: T-A-G     | 0.46     | 0.48      | 0.48            | 0.55             |
| 5a: A-T-A     | 0.21     | 0.23      | 0.24            | 0.21             |
| 5b: G-C-G     | 0.50     | 0.48      | 0.47            | 0.46             |
| 6a: G-A       | 0.51     | 0.49      | 0.47            | 0.46             |
| 6b: T-A       | 0.05     | 0.06      | 0.06            | 0.06             |
| 6c: T-G       | 0.16     | 0.16      | 0.18            | 0.14             |
| 7a: T-C-T     | 0.10     | 0.10      | 0.08            | 0.15             |
| 7b: T-T-T     | 0.42     | 0.40      | 0.42            | 0.34             |

Online Resource 4a-4d . Pairwise  $r^2$  among *LEPR* intron 2 SNPs associated with basal-like breast cancer in CBCS cases and controls.

4a. Pairwise  $r^2$  in African American controls

|            | rs17412175 | rs9436746 | rs9436748 |
|------------|------------|-----------|-----------|
| rs17412175 | 1          |           |           |
| rs9436746  | 0.32       | 1         |           |
| rs9436748  | 0.03       | 0.01      | 1         |

4b. Pairwise  $r^2$  in White controls

|            | rs17412175 | rs9436746 | rs9436748 |
|------------|------------|-----------|-----------|
| rs17412175 | 1          |           |           |
| rs9436746  | 0.86       | 1         |           |
| rs9436748  | 0.12       | 0.10      | 1         |

4c. Pairwise  $r^2$  in African American cases

|            | rs17412175 | rs9436746 | rs9436748 |
|------------|------------|-----------|-----------|
| rs17412175 | 1          |           |           |
| rs9436746  | 0.17       | 1         |           |
| rs9436748  | 0.29       | 0.34      | 1         |

4d. Pairwise  $r^2$  in White cases

|            | rs17412175 | rs9436746 | rs9436748 |
|------------|------------|-----------|-----------|
| rs17412175 | 1          |           |           |
| rs9436746  | 0.09       | 1         |           |
| rs9436748  | 0.06       | 0.45      | 1         |

Online Resource 5. Candidate SNP odds ratios and 95% confidence intervals for the CBCS, with comparisons to previously published studies.

|                                       |         | CBCS OR(95% CI) <sup>a</sup> |                   |                   |                       |                       |                    |                       |
|---------------------------------------|---------|------------------------------|-------------------|-------------------|-----------------------|-----------------------|--------------------|-----------------------|
|                                       |         | All Cases                    | Luminal A         | Basal-like        | Kaklamani et al. [27] |                       |                    |                       |
| <i>ADIPOQ</i><br>rs2241766<br>+45 T/G | GG+GT   | 1.00 (0.84, 1.21)            | 0.99 (0.77, 1.27) | 1.18 (0.78, 1.77) | 0.64 (0.49, 0.83)     |                       |                    |                       |
|                                       | TT      | Referent                     | Referent          | Referent          | Referent              |                       |                    |                       |
|                                       | G vs. T | 1.00 (0.85, 1.18)            | 1.01 (0.82, 1.26) | 1.16 (0.81, 1.66) |                       |                       |                    |                       |
| rs1501299<br>+276 G/T                 | GG      | 1.13 (0.89, 1.45)            | 1.22 (0.86, 1.73) | 0.84 (0.52, 1.37) | 1.80 (1.14, 2.85)     |                       |                    |                       |
|                                       | GT      | 1.10 (0.86, 1.41)            | 1.14 (0.81, 1.63) | 0.72 (0.44, 1.19) | 1.59 (1.03, 2.48)     |                       |                    |                       |
|                                       | TT      | Referent                     | Referent          | Referent          | Referent              |                       |                    |                       |
|                                       | G vs. T | 1.05 (0.95, 1.17)            | 1.09 (0.94, 1.26) | 1.13 (0.95, 1.35) |                       |                       |                    |                       |
|                                       |         | All Cases                    | Luminal A         | Basal-like        | Snoussi et al. [28]   | Woo et al. [29]       | Han et al. [22]    | Cleveland et al. [26] |
| <i>LEPR</i><br>rs1137101<br>Q223R     | GG      | 1.10 (0.91, 1.34)            | 1.35 (1.04, 1.75) | 1.10 (0.72, 1.69) | 2.26 (1.31, 3.90)     | 0.59 (0.19, 1.81)     | Referent           | 1.04 (0.81, 1.34)     |
|                                       | AG      | 0.99 (0.84, 1.16)            | 1.07 (0.86, 1.35) | 1.01 (0.70, 1.47) | 1.68 (1.12, 2.50)     | Referent <sup>3</sup> | 1.30 (1.03, 2.70)  | 1.00 (0.78, 1.27)     |
|                                       | AA      | Referent                     | Referent          | Referent          | Referent              |                       | 7.14 (1.92, 25.60) | Referent              |
|                                       | G vs. A | 1.05 (0.95, 1.16)            | 1.16 (1.02, 1.32) | 1.05 (0.85, 1.30) |                       |                       |                    |                       |
| rs1137100<br>K109R                    | GG      | 1.45 (1.06, 1.97)            | 1.64 (1.10, 2.45) | 1.02 (0.48, 2.21) |                       | 1.08 (0.40, 2.93)     |                    |                       |
|                                       | AG      | 1.00 (0.87, 1.16)            | 1.10 (0.91, 1.34) | 1.04 (0.75, 1.42) |                       | Referent <sup>b</sup> |                    |                       |
|                                       | AA      | Referent                     | Referent          | Referent          |                       |                       |                    |                       |
|                                       | G vs. A | 1.09 (0.97, 1.22)            | 1.18 (1.01, 1.38) | 1.03 (0.79, 1.33) |                       |                       |                    |                       |
| rs8179183<br>K656N                    | CC      | 0.70 (0.48, 1.03)            | 0.70 (0.41, 1.20) | 0.78 (0.34, 1.77) |                       |                       |                    |                       |
|                                       | CG      | 0.90 (0.77, 1.04)            | 1.05 (0.86, 1.28) | 0.84 (0.60, 1.18) |                       | 0.63 (0.14, 2.81)     |                    |                       |
|                                       | GG      | Referent                     | Referent          | Referent          |                       | Referent              |                    |                       |
|                                       | C vs. G | 0.87 (0.77, 0.99)            | 0.97 (0.82, 1.14) | 0.86 (0.65, 1.13) |                       |                       |                    |                       |

<sup>a</sup> odds ratio, 95% confidence interval adjusted for age, self-identified race, African ancestry, offset term

<sup>b</sup> no subjects with AA genotype in study

Online resource 6. Relationship between breast cancer-associated SNPs and WHR<sup>1</sup> in CBCS controls.

| SNP                      | OR (95% CI) <sup>2</sup> | P-value <sup>3</sup> |
|--------------------------|--------------------------|----------------------|
| <i>ADIPOQ</i> rs16861194 |                          | 0.02                 |
| GG                       | 1.97 (1.03, 3.80)        |                      |
| AG                       | 0.76 (0.56, 1.04)        |                      |
| AA                       | Referent                 |                      |
| <i>LEPR</i> rs12042877   |                          | 0.04                 |
| TT                       | 0.93 (0.56, 1.53)        |                      |
| CT                       | 1.34 (1.05, 1.72)        |                      |
| CC                       | Referent                 |                      |

<sup>1</sup> waist-hip ratio,  $\geq 0.77$  vs.  $< 0.77$

<sup>2</sup> OR, CI – odds ratio and 95% confidence interval, adjusted for BMI, age, race, ancestry, and offset term

<sup>3</sup> overall association between SNP and WHR



Online Resource 7. CBCS genotype associations with breast cancer for SNPs included in haplotype analyses.

|             |            | All   |                          |                   | Luminal A   |                   | Basal-like  |                   |
|-------------|------------|-------|--------------------------|-------------------|-------------|-------------------|-------------|-------------------|
| Genotype    | Controls   | Cases | OR (95% CI) <sup>a</sup> | Cases             | OR (95% CI) | Cases             | OR (95% CI) |                   |
| <i>LEP</i>  |            |       |                          |                   |             |                   |             |                   |
| Haplotype 1 | rs12706832 |       |                          |                   |             |                   |             |                   |
|             | GG         | 358   | 401                      | 0.99 (0.81, 1.22) | 143         | 0.98 (0.74, 1.29) | 33          | 0.91 (0.56, 1.46) |
|             | AG         | 764   | 865                      | 1.05 (0.89, 1.23) | 301         | 1.01 (0.81, 1.26) | 77          | 0.91 (0.64, 1.29) |
|             | AA         | 652   | 705                      | Referent          | 234         | Referent          | 90          | Referent          |
|             | rs10244329 |       |                          |                   |             |                   |             |                   |
|             | AA         | 426   | 473                      | 1.00 (0.83, 1.21) | 159         | 0.98 (0.76, 1.28) | 48          | 1.01 (0.66, 1.55) |
|             | AT         | 874   | 995                      | 1.06 (0.90, 1.25) | 343         | 1.05 (0.84, 1.31) | 101         | 1.07 (0.75, 1.54) |
|             | TT         | 475   | 504                      | Referent          | 177         | Referent          | 51          | Referent          |
|             | rs11763517 |       |                          |                   |             |                   |             |                   |
|             | CC         | 321   | 312                      | 0.86 (0.69, 1.06) | 118         | 0.86 (0.65, 1.15) | 24          | 0.88 (0.53, 1.48) |
|             | CT         | 762   | 854                      | 0.97 (0.83, 1.14) | 292         | 0.92 (0.75, 1.14) | 87          | 1.11 (0.79, 1.55) |
|             | TT         | 690   | 806                      | Referent          | 269         | Referent          | 89          | Referent          |
|             | rs7795794  |       |                          |                   |             |                   |             |                   |
|             | AA         | 12    | 21                       | 1.00 (0.84, 1.20) | 6           | 0.97 (0.76, 1.25) | 4           | 1.08 (0.74, 1.57) |
|             | AG         | 286   | 316                      |                   | 105         |                   | 37          |                   |
|             | GG         | 1478  | 1634                     |                   | 568         |                   | 159         |                   |
| Haplotype 2 | rs11760956 |       |                          |                   |             |                   |             |                   |
|             | AA         | 201   | 185                      | 0.86 (0.68, 1.09) | 67          | 0.86 (0.62, 1.19) | 13          | 0.77 (0.41, 1.43) |
|             | AG         | 705   | 802                      | 1.04 (0.90, 1.21) | 280         | 1.02 (0.84, 1.25) | 83          | 1.20 (0.87, 1.65) |
|             | GG         | 870   | 984                      | Referent          | 331         | Referent          | 104         | Referent          |
|             | rs10954173 |       |                          |                   |             |                   |             |                   |
|             | AA         | 201   | 185                      | 0.86 (0.67, 1.09) | 67          | 0.86 (0.62, 1.19) | 13          | 0.76 (0.41, 1.42) |
|             | AG         | 705   | 800                      | 1.04 (0.90, 1.20) | 280         | 1.02 (0.84, 1.25) | 82          | 1.17 (0.85, 1.61) |
|             | GG         | 870   | 986                      | Referent          | 331         | Referent          | 105         | Referent          |

| Genotype    | Controls   | All   |   | OR (95% CI) <sup>a</sup> | Luminal A |                   | Basal-like |                   |     |
|-------------|------------|-------|---|--------------------------|-----------|-------------------|------------|-------------------|-----|
|             |            | Cases |   |                          | Cases     | OR (95% CI)       | Cases      | OR (95% CI)       |     |
| rs3793162   |            |       |   |                          |           |                   |            |                   |     |
| AA          | 19         | 19    | } | 6                        | }         | 3                 | }          | 0.75 (0.59, 0.95) |     |
| AG          | 202        | 178   |   | 58                       |           | 0.82 (0.58, 1.14) |            |                   | 26  |
| GG          | 1555       | 1775  |   | 615                      |           | Referent          |            |                   | 171 |
| rs3828942   |            |       |   |                          |           |                   |            |                   |     |
| AA          | 230        | 267   |   | 97                       |           | 18                |            | 1.08 (0.87, 1.35) |     |
| AG          | 718        | 848   |   | 284                      |           | 82                |            | 1.14 (0.98, 1.32) |     |
| GG          | 824        | 855   |   | 297                      |           | 100               |            | Referent          |     |
| rs17151922  |            |       |   |                          |           |                   |            |                   |     |
| TT          | 42         | 51    |   | 12                       |           | 7                 |            | 1.17 (0.75, 1.83) |     |
| GT          | 259        | 334   |   | 111                      |           | 40                |            | 1.30 (1.05, 1.62) |     |
| GG          | 1475       | 1587  |   | 556                      |           | 153               |            | Referent          |     |
| Haplotype 3 | rs17151922 |       |   |                          |           |                   |            |                   |     |
| TT          | 42         | 51    |   | 12                       |           | 7                 |            | 1.17 (0.75, 1.83) |     |
| GT          | 259        | 334   |   | 111                      |           | 40                |            | 1.30 (1.05, 1.62) |     |
| GG          | 1475       | 1587  |   | 556                      |           | 153               |            | Referent          |     |
| rs10954174  |            |       |   |                          |           |                   |            |                   |     |
| AA          | 8          | 6     | } | 0                        | }         | 1                 | }          | 1.13 (0.84, 1.50) |     |
| AG          | 98         | 122   |   | 35                       |           | 1.01 (0.66, 1.54) |            |                   | 22  |
| GG          | 1670       | 1844  |   | 644                      |           | Referent          |            |                   | 177 |
| rs11761556  |            |       |   |                          |           |                   |            |                   |     |
| AA          | 352        | 384   |   | 139                      |           | 32                |            | 0.97 (0.79, 1.20) |     |
| AC          | 716        | 825   |   | 288                      |           | 71                |            | 1.05 (0.89, 1.24) |     |
| CC          | 704        | 759   |   | 251                      |           | 95                |            | Referent          |     |

*LEPR*

Haplotype 4 rs17412175

| Genotype    | Controls | All   |                          | Luminal A |                   | Basal-like |                   |
|-------------|----------|-------|--------------------------|-----------|-------------------|------------|-------------------|
|             |          | Cases | OR (95% CI) <sup>a</sup> | Cases     | OR (95% CI)       | Cases      | OR (95% CI)       |
| AA          | 264      | 253   | 0.87 (0.69, 1.09)        | 92        | 0.85 (0.62, 1.16) | 14         | 0.60 (0.32, 1.14) |
| AT          | 657      | 749   | 1.00 (0.85, 1.19)        | 264       | 0.98 (0.78, 1.24) | 73         | 1.11 (0.77, 1.62) |
| TT          | 855      | 970   | Referent                 | 323       | Referent          | 113        | Referent          |
| rs9436746   |          |       |                          |           |                   |            |                   |
| CC          | 542      | 555   | 0.86 (0.71, 1.05)        | 197       | 0.79 (0.60, 1.03) | 37         | 0.60 (0.38, 0.96) |
| AC          | 817      | 926   | 0.98 (0.82, 1.16)        | 310       | 0.87 (0.69, 1.11) | 104        | 1.07 (0.75, 1.54) |
| AA          | 413      | 484   | Referent                 | 171       | Referent          | 57         | Referent          |
| rs9436748   |          |       |                          |           |                   |            |                   |
| TT          | 262      | 244   | 0.82 (0.66, 1.03)        | 88        | 0.82 (0.61, 1.11) | 14         | 0.49 (0.26, 0.89) |
| GT          | 730      | 841   | 1.02 (0.88, 1.19)        | 295       | 1.04 (0.84, 1.28) | 79         | 0.96 (0.68, 1.34) |
| GG          | 781      | 887   | Referent                 | 296       | Referent          | 107        | Referent          |
| Haplotype 5 |          |       |                          |           |                   |            |                   |
| rs10749754  |          |       |                          |           |                   |            |                   |
| AA          | 387      | 472   | 1.11 (0.91, 1.34)        | 177       | 1.35 (1.04, 1.74) | 48         | 1.21 (0.78, 1.87) |
| AG          | 890      | 945   | 0.92 (0.79, 1.08)        | 319       | 0.97 (0.78, 1.21) | 106        | 1.15 (0.79, 1.67) |
| GG          | 499      | 555   | Referent                 | 183       | Referent          | 46         | Referent          |
| rs12042877  |          |       |                          |           |                   |            |                   |
| TT          | 116      | 174   | 1.45 (1.12, 1.89)        | 60        | 1.57 (1.11, 2.22) | 20         | 1.59 (0.93, 2.70) |
| CT          | 713      | 787   | 1.04 (0.91, 1.20)        | 281       | 1.12 (0.92, 1.36) | 81         | 1.05 (0.77, 1.44) |
| CC          | 947      | 1010  | Referent                 | 338       | Referent          | 99         | Referent          |
| rs12564626  |          |       |                          |           |                   |            |                   |
| AA          | 328      | 386   | 1.09 (0.90, 1.32)        | 144       | 1.29 (0.99, 1.68) | 37         | 0.97 (0.63, 1.49) |
| AG          | 874      | 954   | 0.96 (0.83, 1.12)        | 334       | 1.06 (0.86, 1.31) | 94         | 0.86 (0.61, 1.20) |
| GG          | 574      | 631   | Referent                 | 201       | Referent          | 69         | Referent          |
| Haplotype 6 |          |       |                          |           |                   |            |                   |
| rs12405556  |          |       |                          |           |                   |            |                   |
| TT          | 84       | 123   | 1.35 (1.00, 1.83)        | 47        | 1.58 (1.06, 2.33) | 9          | 1.02 (0.49, 2.12) |
| GT          | 581      | 637   | 1.00 (0.86, 1.15)        | 231       | 1.06 (0.87, 1.30) | 62         | 0.97 (0.70, 1.35) |
| GG          | 1111     | 1212  | Referent                 | 401       | Referent          | 129        | Referent          |



| Genotype    | Controls | All   |                          |       | Luminal A         |       | Basal-like        |  |
|-------------|----------|-------|--------------------------|-------|-------------------|-------|-------------------|--|
|             |          | Cases | OR (95% CI) <sup>a</sup> | Cases | OR (95% CI)       | Cases | OR (95% CI)       |  |
| rs3762274   |          |       |                          |       |                   |       |                   |  |
| GG          | 351      | 426   | 1.09 (0.89, 1.33)        | 161   | 1.40 (1.07, 1.82) | 49    | 1.08 (0.71, 1.67) |  |
| AG          | 880      | 921   | 0.90 (0.77, 1.05)        | 311   | 0.96 (0.77, 1.20) | 93    | 0.87 (0.61, 1.25) |  |
| AA          | 545      | 623   | Referent                 | 205   | Referent          | 58    | Referent          |  |
| Haplotype 7 |          |       |                          |       |                   |       |                   |  |
| rs2025804   |          |       |                          |       |                   |       |                   |  |
| CC          | 132      | 185   | 1.31 (1.02, 1.69)        | 73    | 1.51 (1.08, 2.09) | 13    | 1.11 (0.59, 2.06) |  |
| CT          | 704      | 755   | 0.96 (0.83, 1.11)        | 269   | 1.02 (0.84, 1.24) | 85    | 1.20 (0.88, 1.65) |  |
| TT          | 940      | 1032  | Referent                 | 337   | Referent          | 102   | Referent          |  |
| rs7518849   |          |       |                          |       |                   |       |                   |  |
| CC          | 30       | 31    | 0.88 (0.51, 1.49)        | 11    | 0.94 (0.45, 1.96) | 5     | 1.15 (0.43, 3.10) |  |
| CT          | 299      | 329   | 1.00 (0.84, 1.21)        | 93    | 0.83 (0.64, 1.08) | 48    | 1.42 (0.98, 2.05) |  |
| TT          | 1447     | 1612  | Referent                 | 575   | Referent          | 147   | Referent          |  |
| rs10158579  |          |       |                          |       |                   |       |                   |  |
| CC          | 108      | 116   | 1.00 (0.74, 1.35)        | 41    | 1.09 (0.73, 1.64) | 13    | 0.82 (0.43, 1.55) |  |
| CT          | 534      | 612   | 1.04 (0.89, 1.21)        | 184   | 0.87 (0.70, 1.08) | 68    | 1.02 (0.73, 1.43) |  |
| TT          | 1134     | 1242  | Referent                 | 454   | Referent          | 118   | Referent          |  |

<sup>a</sup> odds ratio, 95% confidence interval, adjusted for age, self-identified race, African ancestry, and offset term
